# Supplementary material for: Treatment of isolated lymphatic malformation with the herbal medicine “Eppikajyutsuto” - retrospective multicenter study
Source: Research Square preprint supplement (doi:10.21203/rs.3.rs-6890217/v1), 2025-06-18
Supplement: Supplementary file 1 [file 949c3ae85c80f79157bd378d.docx]

| **Table 2: The LM area index and volume index of the patients** | | | |
| --- | --- | --- | --- |
|  | **Pre-administration** | **Post-administration** | ***p-value*** |
| **LM area index (n=33) (mm2)** | 924 (46.53, 22500) | 200 (0, 10000) | < 0.001 |
| **Macrocystic (n=23) (mm2)** | 924 (46.53, 22500) | 200 (0, 10000) | < 0.001 |
| **Mixed macro-microcystic cystic (n=8) (mm2)** | 1076 (75, 3430) | 199.5 (12, 1380) | 0.010 |
| **Microcystic (n=2) (mm2)** | 972 (224, 1720) | 1732.5 (182, 3282) | 0.525 |
| **LM volume index (n=28) (mm3)** | 32118 (1425, 1125000) | 5087 (0, 50000) | < 0.001 |
| **Macrocystic (n=18) (mm3)** | 33646 (3080, 1125000) | 4937.5 (0, 50000) | < 0.001 |
| **Mixed macro-microcystic cystic (n=8) (mm3)** | 37952 (1425, 124488) | 5134 (24, 41040) | 0.016 |
| **Microcystic (n=2) (mm3)** | 17420 (5600, 29240) | 30180.5 (4550, 55811) | 1.000 |
| LM: lymphatic malformation, LM are index was defined as the longitudinal length (mm) x width (mm), LM volume index was defined as the longitudinal length (mm) x width (mm) x depth (mm) | | | |
| Data are presented as median (range) | | | |
