# Supplementary material for: Treatment of isolated lymphatic malformation with the herbal medicine “Eppikajyutsuto” - retrospective multicenter study
Source: Research Square preprint supplement (doi:10.21203/rs.3.rs-6890217/v1), 2025-06-18
Supplement: Supplementary file 2 [file cc1a0a6a6c0a79760901e113.docx]

| **Table 1: Main location of the isolated lymphatic malformation** | |
| --- | --- |
|  | **Patients (n=33)** |
| **Neck** | 11 (33.3) |
| **Head and face** | 8 (24.2) |
| **Axilla** | 2 (6.1) |
| **Chest wall** | 7 (21.2) |
| **Mediastinum** | 1 (3.0) |
| **Intra- and retroperitoneum** | 1 (3.0) |
| **Hip** | 1 (3.0) |
| **Arm / Hand** | 8 (5.4) |
| **Leg / Foot** | 2 (6.1) |
| Values are shown in number (percentage). | |
